# Supplementary figures and images for: Dendrimer-conjugated podophyllotoxin suppresses DENA-induced HCC progression by modulation of inflammatory and fibrogenic factors
Source: Royal Society of Chemistry journal article supplement (doi:10.1039/c9tx00103d), 2019-01-01

**Figure S1 (Supplementary):** Showing body weight of rats in different group at different intervals.

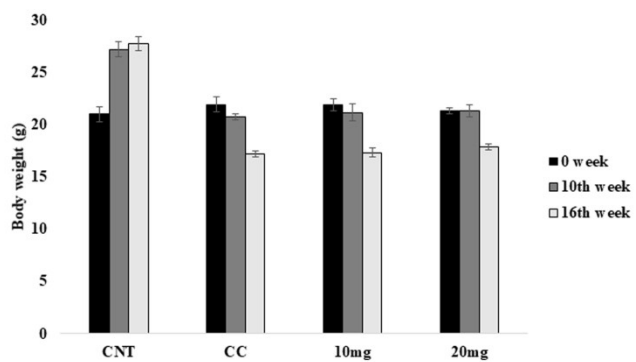

Supplement: c9tx00103d1.pdf [file c9tx00103d1.pdf]
